# Supplementary material for: The Combination of Predictive Factors of Pharmacokinetic Origin Associates with Enhanced Disease Control during Treatment of Pediatric Crohn’s Disease with Infliximab
Source: MDPI journal article supplement (doi:10.3390/pharmaceutics15102408), 2023-09-30

# Supplementary Materials: The Combination of Predictive Factors of Pharmacokinetic Origin Associates with Enhanced Disease Control During Treatment of Pediatric Crohn's Disease with Infliximab

Marla C. Dubinsky <sup>1,\*</sup>, Shervin Rabizadeh <sup>2</sup>, John C Panetta <sup>3</sup>, Elizabeth A. Spencer <sup>1</sup>, Annelie Everts-van der Wind <sup>4</sup> and Thierry Dervieux <sup>4,\*</sup>

**Table S1:** Predictive factors of PK origin and time to CRP based clinical remission in pediatric CD

|                   |             |       |  | Time (days) | HR               | p value |
|-------------------|-------------|-------|--|-------------|------------------|---------|
| <b>Infusion 2</b> |             |       |  |             |                  |         |
| Clearance         | above       | 0.294 |  | 110±27      | ref.             |         |
| L/day             |             |       |  |             |                  |         |
| Clearance below   | 0.294 L/day |       |  | 71±14       | 1.3 (0.9 to 2.0) | 0.188   |
| IFX below         | 20µg/mL     |       |  | 95±18       | ref.             |         |
| IFX above         | 20µg/mL     |       |  | 69±13       | 1.4 (0.9-2.1)    | 0.140   |
| <b>Infusion 3</b> |             |       |  |             |                  |         |
| Clearance         | above       | 0.294 |  | 138±28      | ref.             |         |
| L/day             |             |       |  |             |                  |         |
| Clearance below   | 0.294 L/day |       |  | 76±13       | 1.5 (1.0 to 2.3) | 0.047   |
| IFX below         | 15µg/mL     |       |  | 139±20      | ref.             |         |
| IFX above         | 15µg/mL     |       |  | 46±12       | 2.3 (1.5-3.6)    | <0.001  |
| <b>Infusion 4</b> |             |       |  |             |                  |         |
| Clearance         | above       | 0.294 |  | 188±35      | ref.             |         |
| L/day             |             |       |  |             |                  |         |
| Clearance below   | 0.294 L/day |       |  | 68±11       | 2.1 (1.3 to 3.2) | 0.001   |
| IFX below         | 10µg/mL     |       |  | 142±21      |                  |         |
| IFX above         | 10µg/mL     |       |  | 53±12       | 2.2 (1.4-3.3)    | <0.001  |

**Table S2:** PF of PK origin either alone or combined at the end of induction and during maintenance and disease control over maintenance period.

|                                                                                                                          | <b>parameter*</b>                     | <b>estimates</b>                  |
|--------------------------------------------------------------------------------------------------------------------------|---------------------------------------|-----------------------------------|
| Time<br>and IFX >5µg/mL                                                                                                  | $\theta_{pop}$                        | -0.38±0.53 (p=0.473)              |
|                                                                                                                          | $\theta_{time}$                       | 0.004±0.002 (p=0.046)             |
|                                                                                                                          | $\theta_{concentration}$              | 1.53±0.43 (p<0.001)               |
|                                                                                                                          | -2LL                                  | 361.6                             |
| Time<br>and Clearance <0.294 L/day                                                                                       | $\theta_{pop}$                        | 1.53±0.58 (p=0.008)               |
|                                                                                                                          | $\theta_{time}$                       | 0.004±0.002 (p=0.046)             |
|                                                                                                                          | $\theta_{Cl}$                         | 2.57±0.50 (p<0.001)               |
|                                                                                                                          | -2LL                                  | 353.7 ( $\Delta$ =-7.9; p=0.005)  |
| Time and<br>PF of PK origin (IFX >5µg/mL with<br>Clearance <0.294 L/day)                                                 | $\theta_{pop}$                        | 1.06 ±0.48 (p<0.001)              |
|                                                                                                                          | $\theta_{pop}$                        | 0.004±0.001 (p<0.001)             |
|                                                                                                                          | $\theta_{both\ PF\ of\ PK}$           | 2.97±0.81 (p<0.001)               |
|                                                                                                                          | -2LL                                  | 396 ( $\Delta$ =-12.6; ; p<0.001) |
| Time and both PF of PK origin at<br>infusion 4 (IFX >10µg/mL with<br>Clearance <0.294 L/day) and dur-<br>ing maintenance | $\theta_{pop}$                        | 0.35±0.50 (p=0.012)               |
|                                                                                                                          | $\theta_{both\ PF\ of\ PK\ 4th\ inf}$ | 2.44±0.64 (p<0.001)               |
|                                                                                                                          | $\theta_{time}$                       | 0.002±0.001 (p=0.046)             |
|                                                                                                                          | $\theta_{both\ PF\ of\ PK}$           | 2.51±0.73 (p<0.001)               |
|                                                                                                                          | -2LL                                  | 377.8 ( $\Delta$ =-23.2; p<0.001) |

\*Model:  $\text{logit}(\text{Probability of CRP based remission}) = \theta_{pop} + \theta_{covi} * cov_i + \dots$

**Figure S1: IFX concentration and Clearance at each of the Induction time point and maintenance.**

Panel A: infusion 2; panel B: infusion 3; panel C: infusion 4; panel D: maintenance

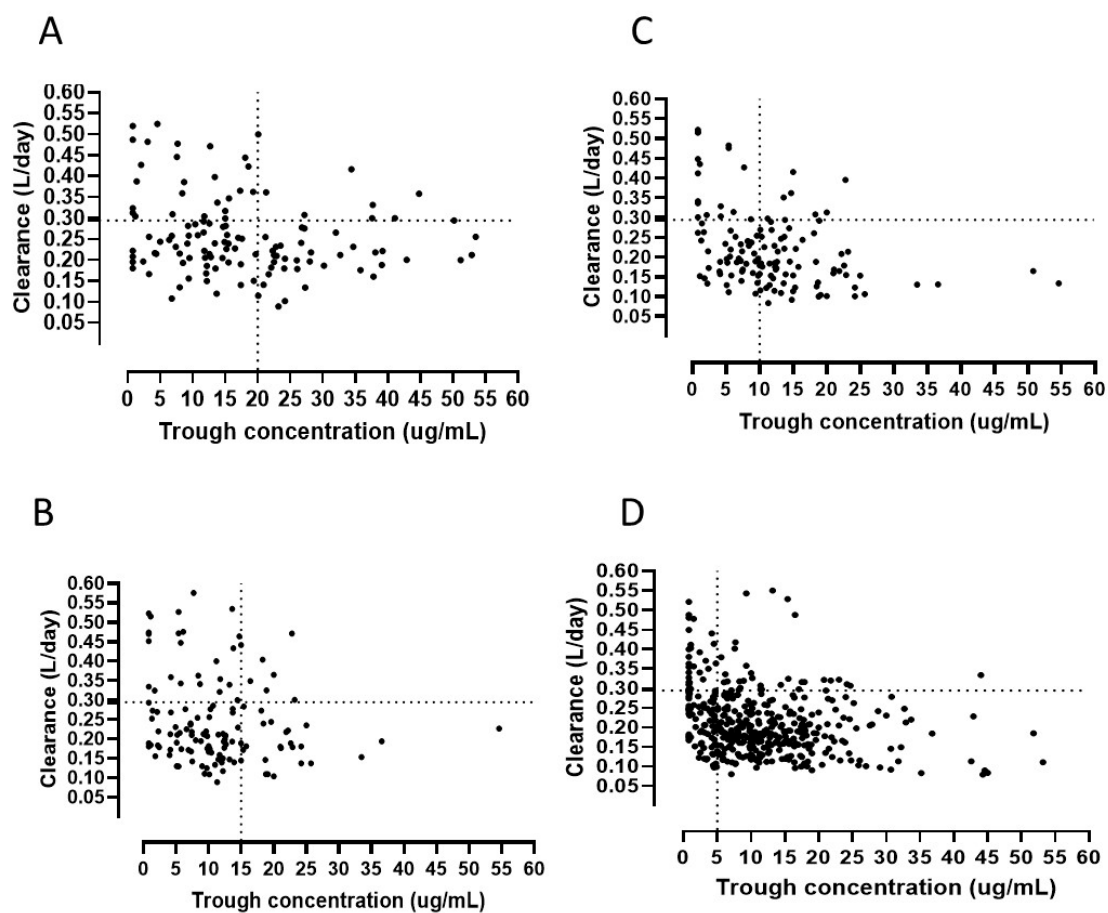

Supplement: s1 [file s1]
